# Supplementary material
Source: PubMed Central journal article supplement (PMC9839657)
Supplement: NIHMS1853322-supplement-1853322_RS.pdf [file NIHMS1853322-supplement-1853322_RS.pdf]

## Reporting Summary

Nature Portfolio wishes to improve the reproducibility of the work that we publish. This form provides structure for consistency and transparency in reporting. For further information on Nature Portfolio policies, see our [Editorial Policies](#) and the [Editorial Policy Checklist](#).

### Statistics

For all statistical analyses, confirm that the following items are present in the figure legend, table legend, main text, or Methods section.

- |     |           |
|-----|-----------|
| n/a | Confirmed |
|-----|-----------|
- The exact sample size ( $n$ ) for each experimental group/condition, given as a discrete number and unit of measurement
  - A statement on whether measurements were taken from distinct samples or whether the same sample was measured repeatedly
  - The statistical test(s) used AND whether they are one- or two-sided  
*Only common tests should be described solely by name; describe more complex techniques in the Methods section.*
  - A description of all covariates tested
  - A description of any assumptions or corrections, such as tests of normality and adjustment for multiple comparisons
  - A full description of the statistical parameters including central tendency (e.g. means) or other basic estimates (e.g. regression coefficient) AND variation (e.g. standard deviation) or associated estimates of uncertainty (e.g. confidence intervals)
  - For null hypothesis testing, the test statistic (e.g.  $F$ ,  $t$ ,  $r$ ) with confidence intervals, effect sizes, degrees of freedom and  $P$  value noted  
*Give  $P$  values as exact values whenever suitable.*
  - For Bayesian analysis, information on the choice of priors and Markov chain Monte Carlo settings
  - For hierarchical and complex designs, identification of the appropriate level for tests and full reporting of outcomes
  - Estimates of effect sizes (e.g. Cohen's  $d$ , Pearson's  $r$ ), indicating how they were calculated

*Our web collection on [statistics for biologists](#) contains articles on many of the points above.*

### Software and code

Policy information about [availability of computer code](#)

**Data collection** Data for the associative learning task was collected using commercial Coulbourn Instruments Graphic State 3 software. Data for the novel object recognition experiments was collected with standard commercial Logitech webcam software.

**Data analysis** Data for the associative learning task was analyzed and used for simulations using Python on Google Colab (link in next section). Data for the novel object recognition experiments was analyzed using commercial TopScan Suite and BORIS suite (Version 7.9.19). All statistical analyses were performed with commercial GraphPad Prism 8.

For manuscripts utilizing custom algorithms or software that are central to the research but not yet described in published literature, software must be made available to editors and reviewers. We strongly encourage code deposition in a community repository (e.g. GitHub). See the Nature Portfolio [guidelines for submitting code & software](#) for further information.

### Data

Policy information about [availability of data](#)

All manuscripts must include a [data availability statement](#). This statement should provide the following information, where applicable:

- Accession codes, unique identifiers, or web links for publicly available datasets
- A description of any restrictions on data availability
- For clinical datasets or third party data, please ensure that the statement adheres to our [policy](#)

All code and data used in this study are available on <https://colab.research.google.com/drive/1VYRAnvAO8OmzQpVaJe5radKIZnpEn638?usp=sharing> and <https://colab.research.google.com/drive/1ORP8Q9ceLBXlupvrCDh7HLAhQKsjQswr?usp=sharing>.

## Field-specific reporting

Please select the one below that is the best fit for your research. If you are not sure, read the appropriate sections before making your selection.

Life sciences       Behavioural & social sciences       Ecological, evolutionary & environmental sciences

For a reference copy of the document with all sections, see [nature.com/documents/nr-reporting-summary-flat.pdf](https://www.nature.com/documents/nr-reporting-summary-flat.pdf)

## Behavioural & social sciences study design

All studies must disclose on these points even when the disclosure is negative.

|                   |                                                                                                                                                                                                                          |
|-------------------|--------------------------------------------------------------------------------------------------------------------------------------------------------------------------------------------------------------------------|
| Study description | Animal study examining the effect of neural manipulation on behavior (food port or object approach) combined with computational modelling. Data are quantitative.                                                        |
| Research sample   | Long Evans rats, males, >3 months of age at the start of the experiment, a representative sample. Sample size was based on published research from the same and other labs (Sharpe et al., 2017, Steinberg et al, 2013). |
| Sampling strategy | Rats were allocated at random to each group.                                                                                                                                                                             |
| Data collection   | Data collection was done by an automated computer. It was a within-subject's design, all stimuli presented randomly by experimenter.                                                                                     |
| Timing            | August 2020 - October 2020                                                                                                                                                                                               |
| Data exclusions   | One rat in each group was excluded due to incorrect anatomical placement of the viral injections, and two rats were excluded from the control group due to a hardware malfunction during one of the behavioral sessions. |
| Non-participation | No human participants were involved in this study                                                                                                                                                                        |
| Randomization     | Within subjects design so all animals received all conditions in a counterbalanced manner.                                                                                                                               |

## Reporting for specific materials, systems and methods

We require information from authors about some types of materials, experimental systems and methods used in many studies. Here, indicate whether each material, system or method listed is relevant to your study. If you are not sure if a list item applies to your research, read the appropriate section before selecting a response.

### Materials & experimental systems

| n/a                                 | Involved in the study                                           |
|-------------------------------------|-----------------------------------------------------------------|
| <input checked="" type="checkbox"/> | <input type="checkbox"/> Antibodies                             |
| <input checked="" type="checkbox"/> | <input type="checkbox"/> Eukaryotic cell lines                  |
| <input checked="" type="checkbox"/> | <input type="checkbox"/> Palaeontology and archaeology          |
| <input type="checkbox"/>            | <input checked="" type="checkbox"/> Animals and other organisms |
| <input checked="" type="checkbox"/> | <input type="checkbox"/> Human research participants            |
| <input checked="" type="checkbox"/> | <input type="checkbox"/> Clinical data                          |
| <input checked="" type="checkbox"/> | <input type="checkbox"/> Dual use research of concern           |

### Methods

| n/a                                 | Involved in the study                           |
|-------------------------------------|-------------------------------------------------|
| <input checked="" type="checkbox"/> | <input type="checkbox"/> ChIP-seq               |
| <input checked="" type="checkbox"/> | <input type="checkbox"/> Flow cytometry         |
| <input checked="" type="checkbox"/> | <input type="checkbox"/> MRI-based neuroimaging |

## Animals and other organisms

Policy information about [studies involving animals](#); [ARRIVE guidelines](#) recommended for reporting animal research

|                         |                                                                                   |
|-------------------------|-----------------------------------------------------------------------------------|
| Laboratory animals      | Male Long Evans rats, males, >3 months old                                        |
| Wild animals            | The study did not involve wild animals                                            |
| Field-collected samples | The study did not involve samples collected from the field                        |
| Ethics oversight        | All animal experiments were approved by the NIDA IRP ACUC (protocol #20-CNRB-108) |

Note that full information on the approval of the study protocol must also be provided in the manuscript.
