# Supplementary material
Source: PubMed Central journal article supplement (PMC9839657)
Supplement: NIHMS1853322-supplement-1853322_Sup_Info.pdf [file NIHMS1853322-supplement-1853322_Sup_Info.pdf]

# Supplemental Information

## Supplementary Tables

**Supplementary Table 1. Statistical results of behavioral experiments**

| <b>Conditioning (3-way ANOVA)</b>          | <b>SS</b> | <b>MS</b> | <b>F (DFn, DFd)</b> | <b>P value</b> |
|--------------------------------------------|-----------|-----------|---------------------|----------------|
| Sessions                                   | 39952     | 5707      | F (7, 182) = 26.74  | P<0.0001****   |
| (CTRL vs hM4d)                             | 2512      | 2512      | F (1, 26) = 0.7170  | P=0.4048       |
| (A vs B)                                   | 12.16     | 12.16     | F (1, 26) = 0.02112 | P=0.8856       |
| Sessions x (CTRL vs hM4d)                  | 6981      | 997.3     | F (7, 182) = 4.672  | P<0.0001****   |
| Sessions x (A vs B)                        | 874.0     | 124.9     | F (7, 182) = 1.353  | P=0.2279       |
| (CTRL vs hM4d) x (A vs B)                  | 9.810     | 9.810     | F (1, 26) = 0.01703 | P=0.8972       |
| Sessions x (CTRL vs hM4d) x (A vs B)       | 517.3     | 73.90     | F (7, 182) = 0.8008 | P=0.5876       |
| <b>CTA (3-way ANOVA)</b>                   | <b>SS</b> | <b>MS</b> | <b>F (DFn, DFd)</b> | <b>P value</b> |
| Sessions                                   | 37224     | 18612     | F (2, 52) = 64.18   | P<0.0001****   |
| (CTRL vs hM4d)                             | 1344      | 1344      | F (1, 26) = 2.912   | P=0.0998       |
| (ND vs D)                                  | 53832     | 53832     | F (1, 26) = 127.1   | P<0.0001****   |
| Sessions x (CTRL vs hM4d)                  | 39.38     | 19.69     | F (2, 52) = 0.06789 | P=0.9344       |
| Sessions x (ND vs D)                       | 41521     | 20761     | F (2, 52) = 83.36   | P<0.0001****   |
| (CTRL vs hM4d) x (ND vs D)                 | 155.6     | 155.6     | F (1, 26) = 0.3675  | P=0.5497       |
| Sessions x (CTRL vs hM4d) x (ND vs D)      | 32.92     | 16.46     | F (2, 52) = 0.06609 | P=0.9361       |
| <b>PROBE – whole session (2-way ANOVA)</b> | <b>SS</b> | <b>MS</b> | <b>F (DFn, DFd)</b> | <b>P value</b> |
| (CTRL vs hM4d)                             | 806.6     | 806.6     | F (1, 26) = 4.340   | P=0.0472*      |
| (A vs B)                                   | 143.3     | 143.3     | F (1, 26) = 1.743   | P=0.1983       |
| (CTRL vs hM4d) x (A vs B)                  | 658.8     | 658.8     | F (1, 26) = 8.013   | P=0.0088**     |
| <b>PROBE – trials (3-way ANOVA)</b>        | <b>SS</b> | <b>MS</b> | <b>F (DFn, DFd)</b> | <b>P value</b> |
| Trials                                     | 14489     | 2070      | F (7, 182) = 4.142  | P=0.0003***    |
| (CTRL vs hM4d)                             | 2207      | 2207      | F (1, 26) = 3.121   | P=0.0890       |
| (A vs B)                                   | 1860      | 1860      | F (1, 26) = 1.148   | P=0.2938       |
| Trials x (CTRL vs hM4d)                    | 959.7     | 137.1     | F (7, 182) = 0.2743 | P=0.9633       |
| Trials x (A vs B)                          | 2840      | 405.8     | F (7, 182) = 0.6098 | P=0.7474       |
| (CTRL vs hM4d) x (A vs B)                  | 7711      | 7711      | F (1, 26) = 8.013   | P=0.0384*      |
| Trials x (CTRL vs hM4d) x (A vs B)         | 2778      | 396.8     | F (7, 182) = 0.5963 | P=0.7584       |

**Supplementary Table 2. Comparisons of fitted parameters for the control and hM4d groups with the two tested reinforcement learning models.** Data are represented as mean  $\pm$  SEM.

| <b><i>Ha: Precision deficit model parameters</i></b>                    | <b>Control</b>     | <b>hM4d</b>        | <b>P value</b> |
|-------------------------------------------------------------------------|--------------------|--------------------|----------------|
| <i>Imprecision term - <math>\chi</math></i>                             | 0.64 $\pm$ 0.138   | 1.031 $\pm$ 0.099  | P=0.027*       |
| <i>Model-based value observation rate - <math>\eta^{mb}</math></i>      | 2.669 $\pm$ 1.964  | 5.062 $\pm$ 2.626  | P=0.169        |
| <i>Model-based transition observation rate - <math>\eta^{tm}</math></i> | 11 $\pm$ 4.657     | 22.41 $\pm$ 4.477  | P=0.067        |
| <i>Strength of devaluation - NegRew</i>                                 | -50.82 $\pm$ 5.092 | -60.21 $\pm$ 4.81  | P=0.185        |
| <i>Value adjustment - <math>\nabla_{pell2cue}</math></i>                | 0.718 $\pm$ 0.069  | 0.512 $\pm$ 0.066  | P=0.04*        |
| <b><i>Hb: MB vs MF model parameters</i></b>                             |                    |                    |                |
| <i>Model-free observation rate - <math>\eta^{mf}</math></i>             | 3.71 $\pm$ 2.778   | 15.21 $\pm$ 4.758  | P=0.007**      |
| <i>Model-based observation rate - <math>\eta^{mb}</math></i>            | 12.8 $\pm$ 4.51    | 15.77 $\pm$ 4.82   | P=0.575        |
| <i>Contribution of model-free system - <math>w^{mf}</math></i>          | 0.553 $\pm$ 0.106  | 0.703 $\pm$ 0.081  | P=0.513        |
| <i>Strength of devaluation - NegRew</i>                                 | -52.09 $\pm$ 5.85  | -54.78 $\pm$ 5.243 | P=0.821        |
| <i>Value adjustment - <math>\nabla_{pell2cue}</math></i>                | 0.761 $\pm$ 0.069  | 0.501 $\pm$ 0.059  | P=0.012*       |
| <i>Conditioning to probe forgetting - <math>\nabla_{cp}</math></i>      | 0.603 $\pm$ 0.079  | 0.385 $\pm$ 0.083  | P=0.071        |
